# Supplementary material for: Efficiency and Usability of a Near Field Communication-Enabled Tablet for Medication Administration
Source: PubMed Central journal article supplement (PMC4114445; doi:10.2196/mhealth.3215), 2014-06-02
Supplement: mhealth_v2i2e26_app2.pdf [file mhealth_v2i2e26_app2.pdf]

### *Qualitative Interview Guide*

1. How was your experience using the BWH e-MAR system? What did you like? What did you dislike?
2. How did today's simulation compare with your usual e-MAR use in the hospital?
3. How was your experience using the mobile NFC e-MAR system?
  - a. What did you like?
  - b. What did you dislike?
4. Describe your experience scanning with NFC (medications, the patient and your badge)
  - a. Is this the same or different than your experience with the barcode technology?
5. Describe your experience performing e-MAR using a tablet?
  - a. How was the device size?
  - b. How was the portability?
6. How does the mobile device fit into your medication administration workflow?
